# Supplementary material for: The Novel Role of Zfp296 in Mammalian Embryonic Genome Activation as an H3K9me3 Modulator
Source: Int J Mol Sci. 2023 Jul 12;24(14):11377. doi: 10.3390/ijms241411377 (PMC10379624; doi:10.3390/ijms241411377)
Supplement: Supplementary file 1 [file ijms-24-11377-s001.zip]

Archive with 5 entries (5 files):
- Supplement figtures_20230629233457.pdf
- table S1.xlsx
- table S2.xlsx
- table S3.xlsx
- table S4.xlsx
