# Supplementary material for: The Novel Role of Zfp296 in Mammalian Embryonic Genome Activation as an H3K9me3 Modulator
Source: Int J Mol Sci. 2023 Jul 12;24(14):11377. doi: 10.3390/ijms241411377 (PMC10379624; doi:10.3390/ijms241411377)
Supplement: Supplementary file 1 [file ijms-24-11377-s001.zip › table S1.xlsx]

## Sheet: Sheet1
Genes whose expression changes both during early mouse embryonic EGA and in KO Zfp296 mESCs
up-regulated in mouse EGA		logFC	padj
ENSMUSG00000003352	Cacnb3	1.19981	0.0260984
ENSMUSG00000064343	mt-Tq	3.27179	2.91553e-05
ENSMUSG00000064367	mt-Nd5	1.59747	0.00162861
ENSMUSG00000027332	Ivd	2.65073	6.33248e-06
ENSMUSG00000024998	Plce1	2.06799	4.00841e-05
ENSMUSG00000064355	mt-Tk	1.97041	0.00873473
ENSMUSG00000064364	mt-Th	2.07333	0.0097519
ENSMUSG00000050732	Vamp8	2.60665	2.98996e-06
ENSMUSG00000064371	mt-Tt	3.00007	0.000298688
ENSMUSG00000018340	Anxa6	1.40381	0.00340945
ENSMUSG00000034312	Iqsec1	1.24448	0.0168823
ENSMUSG00000006205	Htra1	3.04071	0.000203815
ENSMUSG00000006386	Tek	2.35771	0.00222083
ENSMUSG00000080268	Brms1	1.35169	0.000496208
ENSMUSG00000100131	Gm28439	1.4711	0.0199202
ENSMUSG00000048832	Vps37c	2.66443	0.000319925
ENSMUSG00000035121	Neil2	1.72503	0.00696999
ENSMUSG00000059355	Wdr83os	3.64794	4.82965e-05
ENSMUSG00000068323	Slc4a5	3.62594	1.25027e-05
ENSMUSG00000030246	Ldhb	1.43921	0.000235347
ENSMUSG00000022548	Apod	2.4971	0.00396732
ENSMUSG00000096619	Eif1ad14	4.28025	0.0384407
ENSMUSG00000028467	Gba2	2.22559	0.00559995
ENSMUSG00000053765	Oas1f	1.51858	0.00746918
ENSMUSG00000114140	Gm6943	3.94931	5.19259e-05
ENSMUSG00000113805	Eif1ad12	4.58886	0.0492556
ENSMUSG00000018585	Atox1	1.26064	0.00308928
ENSMUSG00000075014	Gm10800	3.45701	0.0224951
ENSMUSG00000034343	Ube2f	1.05191	0.0195252
ENSMUSG00000000730	Dnmt3l	2.09199	7.52222e-05
ENSMUSG00000027331	Knstrn	1.01151	0.00149087
ENSMUSG00000095419	Gm14328	2.96899	3.25496e-05
ENSMUSG00000038368	Focad	2.17187	0.000467294
ENSMUSG00000030559	Rab38	1.93588	0.0101976
ENSMUSG00000035064	Eef2k	1.77227	1.12176e-05
ENSMUSG00000042066	Tmcc2	2.1326	0.00226694
ENSMUSG00000064344	mt-Tm	3.74109	7.81237e-06
ENSMUSG00000021023	Prorp	1.40908	0.0371003
ENSMUSG00000042216	Sgsm1	1.75052	0.000173064
ENSMUSG00000026730	Pter	1.78433	0.0214545
ENSMUSG00000064342	mt-Ti	2.42839	0.000767659
ENSMUSG00000044876	Zfp444	1.14604	0.0362632
ENSMUSG00000037221	Mospd3	4.2425	0.000278292
ENSMUSG00000027712	Anxa5	3.81437	0.000177654
ENSMUSG00000054169	Ceacam10	3.13373	0.0343938
ENSMUSG00000039599	Fam149b	1.48597	2.28723e-05
ENSMUSG00000051736	Fam229b	5.51669	3.30164e-06
ENSMUSG00000035521	Gnptg	1.22296	0.00156131
ENSMUSG00000046718	Bst2	4.55196	2.16427e-05
ENSMUSG00000004032	Gstm5	2.69007	1.62747e-05
ENSMUSG00000064372	mt-Tp	2.50861	0.000202641
ENSMUSG00000021420	Fars2	1.1564	0.0145703
ENSMUSG00000083454	Gm13226	1.74788	0.00074334
ENSMUSG00000032540	Abhd5	1.71602	0.00179057
ENSMUSG00000087819	Gm25117	1.30067	0.0456219
ENSMUSG00000074026	Gm6091	2.14289	0.00300814
ENSMUSG00000035458	Tnni3	2.97983	2.5894e-05
ENSMUSG00000041571	Selenow	1.07729	0.000270504
ENSMUSG00000046856	Gpr1	3.13109	0.000181118
ENSMUSG00000047369	Dnah14	1.78642	0.00254655
ENSMUSG00000027805	Pfn2	1.21597	0.00307694
ENSMUSG00000027639	Samhd1	1.01091	0.00180136
ENSMUSG00000076138	Gm26377	2.64004	0.00227777
ENSMUSG00000029720	Gm20605	1.43234	0.0472694
ENSMUSG00000085921	Gm13752	1.30105	0.0127368
ENSMUSG00000052712	BC004004	1.20355	0.0166502
ENSMUSG00000097715	Gpr137b-ps	3.4548	3.98865e-06
ENSMUSG00000022386	Trmu	1.17361	0.0469461
ENSMUSG00000053070	Cfap300	3.73217	9.53502e-05
ENSMUSG00000098973	Mir6236	1.47931	0.00540489
ENSMUSG00000053856	Dnajc5g	3.05289	0.0162196
ENSMUSG00000004952	Rasa4	3.09114	2.76619e-06
ENSMUSG00000066026	Dhrs3	3.90533	1.1324e-05
ENSMUSG00000045106	Ccdc73	1.56175	3.77657e-06
ENSMUSG00000094724	Rnaset2b	3.75074	2.49009e-06
ENSMUSG00000097039	Pvt1	2.55235	0.000295549
ENSMUSG00000049305	Ccdc71	2.17508	0.000264619
ENSMUSG00000019952	Poc1b	1.25722	0.0458458
ENSMUSG00000112983	Gm32939	3.78569	0.000252236
ENSMUSG00000021287	Xrcc3	1.68135	0.00252635
ENSMUSG00000045519	Zfp560	1.69384	0.00156254
ENSMUSG00000027380	Acoxl	3.06034	0.000197774
ENSMUSG00000011632	Pinlyp	2.81748	0.000459078
ENSMUSG00000026502	Desi2	1.03455	0.0176303
ENSMUSG00000025733	Rhot2	1.73284	0.000118092
ENSMUSG00000033009	Ogfod1	1.29058	0.0492768
ENSMUSG00000026176	Ctdsp1	2.21313	4.18568e-05
ENSMUSG00000069805	Fbp1	1.10049	0.0202634
ENSMUSG00000034278	Dnajc17	1.16248	0.0102191
ENSMUSG00000040187	Arntl2	2.96676	5.33279e-07
ENSMUSG00000079557	Marchf2	1.72245	0.0165104
down-regulated in mouse EGA		logFC
ENSMUSG00000046223	Plaur	-2.53398	6.24607e-06
ENSMUSG00000026648	Dclre1c	-1.99708	0.00075851
ENSMUSG00000033826	Dnah8	-1.12023	0.00484291
ENSMUSG00000033386	Frrs1	-1.30912	0.00502358
ENSMUSG00000039269	2300002M23Rik	-2.62035	0.019654
ENSMUSG00000028007	Snx7	-4.84901	2.25392e-06
ENSMUSG00000086473	Gm16265	-1.95336	0.000594948
ENSMUSG00000025666	Tmem47	-2.85054	0.00163924
ENSMUSG00000096449	Gm4076	-3.62716	3.55268e-06
ENSMUSG00000029120	Ppp2r2c	-2.6981	0.000454681
ENSMUSG00000053617	Sh3pxd2a	-1.23918	0.00515011
ENSMUSG00000086981	Gm12171	-1.37452	0.0116049
ENSMUSG00000021661	Ankra2	-1.01343	0.0469461
ENSMUSG00000027076	Timm10	-3.04692	0.00305939
ENSMUSG00000023403	Stk31	-1.25694	0.00641506
ENSMUSG00000001288	Rarg	-1.37668	0.00544352
ENSMUSG00000070708	Gtsf1l	-1.90135	2.71822e-05
ENSMUSG00000032384	Csnk1g1	-1.66882	8.29367e-05
ENSMUSG00000021770	Samd8	-1.28333	0.00058526
ENSMUSG00000026003	Acadl	-4.04194	0.000304057
ENSMUSG00000034883	Lrr1	-1.55386	0.000359538
ENSMUSG00000027698	Nceh1	-1.40921	0.00633433
ENSMUSG00000075023	Accsl	-1.54576	1.41533e-05
ENSMUSG00000024594	Prrc1	-2.38836	2.01463e-05
ENSMUSG00000020059	Sycp3	-1.58396	0.00215215
ENSMUSG00000020419	Hormad2	-2.72026	0.00238257
ENSMUSG00000057530	Ece1	-1.65519	0.00201344
ENSMUSG00000027806	Tsc22d2	-2.03562	1.21071e-05
ENSMUSG00000026288	Inpp5d	-2.18836	4.18346e-06
ENSMUSG00000004948	Zp3	-1.57327	0.0205295
ENSMUSG00000053783	1700016K19Rik	-1.40081	8.21533e-05
ENSMUSG00000016181	Utp25	-1.78074	0.00621773
ENSMUSG00000053483	Usp21	-1.02137	2.8106e-06
ENSMUSG00000027351	Spred1	-1.59032	0.000271501
ENSMUSG00000028402	Mpdz	-1.15231	3.98302e-05
ENSMUSG00000007815	Rhoa	-1.21511	0.00140201
ENSMUSG00000041354	Rgl2	-1.81394	0.00275997
ENSMUSG00000085793	Lin52	-1.23167	0.0472248
ENSMUSG00000030917	Tmem159	-2.37702	0.0208554
ENSMUSG00000079478	Znrd2	-2.12089	7.79728e-05
ENSMUSG00000022575	Gsdmd	-1.00002	0.0307701
ENSMUSG00000101309	Gm29397	-2.45575	0.00167493
ENSMUSG00000037234	Hook3	-1.19837	0.00202123
ENSMUSG00000046598	Bdh1	-1.4208	0.0151398
ENSMUSG00000116614	Gm46610	-1.82346	0.00489603
ENSMUSG00000070883	Ccdc173	-3.83527	0.00233603
ENSMUSG00000024486	Hbegf	-2.97521	0.00155042
ENSMUSG00000014232	Cluap1	-1.32246	0.0243817
ENSMUSG00000028076	Cd1d1	-4.54651	9.68752e-05
ENSMUSG00000051455	Meioc	-3.46135	0.00012237
ENSMUSG00000080839	Gm11625	-1.13472	0.000718801
ENSMUSG00000037270	4932438A13Rik	-1.30154	0.000502276
ENSMUSG00000057234	Mettl15	-2.85435	0.00188648
ENSMUSG00000078919	Dpm1	-1.35831	0.0158656
ENSMUSG00000005892	Trh	-4.32452	0.000195941
ENSMUSG00000003070	Efna2	-1.99905	0.00125045
ENSMUSG00000025010	Ccnj	-1.39559	0.000344856
ENSMUSG00000064141	Zfp69	-2.36402	0.0309965
ENSMUSG00000065518	Mir423	-1.75182	0.0100248
ENSMUSG00000027787	Nmd3	-1.7068	0.00139538
ENSMUSG00000024867	Pip5k1b	-2.11578	0.0142773
ENSMUSG00000029098	Acox3	-1.22972	0.0137456
ENSMUSG00000114321	Gm8971	-2.98363	7.96677e-05
ENSMUSG00000110932	Gm48640	-1.88089	0.00192907
ENSMUSG00000049382	Krt8	-1.69574	0.000500794
ENSMUSG00000036291	Ap5m1	-1.13296	0.00105819
ENSMUSG00000115248	Gm49037	-1.33275	0.0193798
ENSMUSG00000025932	Eya1	-1.02052	0.0202761
ENSMUSG00000024807	Syvn1	-1.45221	0.0195252
ENSMUSG00000055024	Ep300	-1.56176	0.000639688
ENSMUSG00000026435	Slc45a3	-1.44051	2.65541e-05
ENSMUSG00000021773	Comtd1	-2.68744	0.0033275
ENSMUSG00000042992	Borcs5	-1.01452	0.0184205
ENSMUSG00000061286	Exosc5	-1.20232	0.000738358
ENSMUSG00000102190	Gm38166	-1.09683	0.0235236
ENSMUSG00000081159	Gm6023	-1.05898	0.00628876
ENSMUSG00000103759	Btf3-ps12	-1.29986	0.0369639
ENSMUSG00000084104	Gm13578	-1.00761	0.024592
ENSMUSG00000020024	Cep83	-1.09074	0.000599741
ENSMUSG00000084213	Hspe1-ps5	-1.99838	0.000129604
ENSMUSG00000036186	Dipk1b	-2.43303	0.0333974
ENSMUSG00000028992	Nmnat1	-2.70729	0.000260452
ENSMUSG00000033581	Igf2bp2	-2.30932	7.44212e-06
ENSMUSG00000048833	Slc39a9	-2.03005	0.00341167
ENSMUSG00000044068	Zrsr1	-2.13191	0.00181242
ENSMUSG00000111897	Gm19810	-1.66431	0.019292
ENSMUSG00000016552	Foxred2	-2.94907	0.00558023
ENSMUSG00000055024	Ep300	-1.56176	0.000639688
ENSMUSG00000022024	Sugt1	-1.37086	2.55277e-05
ENSMUSG00000029290	Zfp326	-1.46442	0.00058526
ENSMUSG00000010592	Dazl	-1.01221	0.000407407
ENSMUSG00000038369	Ncoa6	-1.07746	0.00610126
