# Supplementary material for: The Novel Role of Zfp296 in Mammalian Embryonic Genome Activation as an H3K9me3 Modulator
Source: Int J Mol Sci. 2023 Jul 12;24(14):11377. doi: 10.3390/ijms241411377 (PMC10379624; doi:10.3390/ijms241411377)
Supplement: Supplementary file 1 [file ijms-24-11377-s001.zip › table S2.xlsx]

## Sheet: Sheet1
FPKM of Kdm5b.etc in early embryos
FPKM of Kdm5b.etc in human early embyros	FPKM of Kdm5b.etc in mouse early embyros
	oocyte_1	oocyte_2	oocyte_3	zygote_1	zygote_2	zygote_3	2cell_1	2cell_2	2cell_3	2cell_4	2cell_5	2cell_6	4cell_1	4cell_2	4cell_3	4cell_4	4cell_5	4cell_6	4cell_7	4cell_8	4cell_9	4cell_10	4cell_11	4cell_12	8cell_1	8cell_2	8cell_3	8cell_4	8cell_5	8cell_6	8cell_7	8cell_8	8cell_9	8cell_10	8cell_11	8cell_12	8cell_13	8cell_14	8cell_15	8cell_16	8cell_17	8cell_18	8cell_19	8cell_20	morula_1	morula_2	morula_3	morula_4	morula_5
kdm5b	0.181743	0.279935	0.399642	0.451798	0.198932	0.295195	0.198211	0.281245	0.100099	0.152723	0.298838	0.185623	0.398827	0.115416	0.161346	0.190988	0.878987	0.140844	0.575236	1.45405	0.0507844	1.03623	0.160718	0.434951	63.3244	30.1642	65.3522	38.0081	40.7034	26.7975	22.9668	38.6307	15.1069	19.4292	10.7984	13.3111	54.0181	56.6661	60.3529	83.7957	62.568	69.8562	66.4925	53.4783	10.8011	7.73613	0.0726633	12.6945	9.56679
dnmt1	8.02791	625.859	700.051	814.047	593.938	948.486	1508.26	1811.77	1419.61	1751.38	1153.41	1237.38	739.521	1069.01	838.816	809.585	738.585	924.074	818.758	748.476	643.994	683.272	656.899	943.27	50.2142	88.7449	99.5004	38.9944	45.1515	77.1308	79.77	73.924	367.903	279.321	423.361	421.504	121.481	120.886	103.432	156.496	161.24	213.891	155.394	76.7481	64.8237	28.8787	141.464	78.365	36.8044
dnmt3b	311.407	74.9208	70.983	42.0639	46.9775	46.1975	29.7081	38.6244	43.666	39.0505	35.1854	37.073	36.0896	39.6917	44.5056	38.2917	15.022	15.4638	15.6962	32.9628	45.6725	37.8638	36.7774	36.161	0.938514	0.620962	0.305357	0.426309	0.093451	0.544332	11.7581	12.73	10.9975	6.48105	3.04626	0.057402	2.43205	1.56397	0.08852	1.31226	0.067352	0.802713	1.00212	0.378192	2.57329	2.25361	0.447651	2.21461	8.2928
smarca4	35.9263	10.3514	12.4502	8.40314	10.3485	9.69443	8.0036	7.76834	8.4894	11.7196	9.85787	8.78193	17.6241	7.06618	13.4584	9.91398	22.6386	9.96801	15.7266	10.2909	6.47524	7.74567	5.05251	8.92342	7.02471	6.6354	5.95555	9.04423	7.38388	2.37837	5.61497	3.65894	4.19636	6.07658	10.9551	5.12406	11.9202	6.90881	7.37571	4.27281	11.8706	14.5121	6.31044	4.60898	5.35692	6.15564	0.501545	7.52282	6.9027
hp1 beta	2.65481	95.9193	78.7229	107.024	104.191	103.739	136.993	158.912	121.736	137.831	107.529	128.73	86.5932	61.5615	44.2287	56.7701	56.8114	80.5996	45.2534	54.8882	49.4962	65.1514	56.5175	55.2221	19.0086	25.8141	33.7476	28.3066	11.8786	25.8597	12.4727	35.8172	40.4441	38.3517	33.717	37.3594	13.1698	20.1808	20.3631	16.4629	17.7009	33.7582	25.5379	26.1372	18.7143	32.371	13.5232	35.2608	28.6966
uhrf1	18.0385	463.322	425.471	283.492	251.389	205.074	287.266	388.88	330.441	289.157	335.66	308.806	174.003	266.722	235.492	240.796	172.839	113.414	138.697	176.118	241.543	217.334	236.731	227.299	1.56851	1.4002	2.6893	0.834672	0.74846	2.76398	0.151254	4.46128	49.2204	60.1191	59.8799	40.5255	9.72146	10.4786	7.93878	10.9836	9.01898	3.47669	9.44219	6.25888	0.150198	0.418074	1.54571	2.34874	0.69643
trim28	95.2209	10.1517	12.9139	3.60987	3.15505	3.51906	3.36296	4.14058	6.46025	5.65138	5.90192	5.87473	9.56868	7.84183	13.3573	10.0686	5.13934	6.70178	6.46299	10.1383	8.0032	11.3803	16.9253	9.54006	100.416	114.922	94.0231	82.4276	99.2682	79.7592	106.553	119.874	30.4122	20.021	19.5991	25.0489	71.5167	78.8665	113.938	94.1128	80.8784	111.361	99.2101	147.112	29.8643	49.658	0.605796	39.9461	42.1473
Suv39h1	0.0863864	0.164565	0.209386	0.92003	0.46747	0.617078	0.933616	0.917296	1.09838	1.19061	0.588371	0.410739	0	0.591725	2.49209	0.598518	0	0.0260385	2.25973	0.199924	1.27807	0.723215	1.31484	1.35613	7.70446	3.09267	3.60842	4.93817	7.64875	8.01632	3.91365	1.53412	2.32863	0	2.0541	0.231044	4.16062	2.84301	0.0318024	1.05141	3.4728	9.0034	5.65704	7.62324	5.28755	1.28338	0	0.42965	2.82745
Stedb1	2.59497	2.37619	2000	7.18151	10.4742	8.94334	7.56115	9.13507	7.67865	7.27222	5.56691	6.90915	10.4902	8.05976	11.4992	12.9155	5.46029	8.0137	9.73068	4.99019	5.44275	6.91334	3.73352	9.82082	0.928241	2.08614	0	0	0	0.068636	0.75756	1.03119	4.22428	2.37098	4.63486	3.17507	1.39481	2.79544	0	0	0	0.492262	0	4.57542	0.511894	0.46324	0	1.52885	0.349984
kdm4a	0.609429	43.3486	43.5378	39.153	30.4719	42.4291	34.3836	32.8725	30.1151	31.5217	30.3671	30.8985	88.123	46.8675	27.3121	31.4217	63.3601	69.3385	49.3641	24.7767	22.4234	28.2495	16.7103	35.3913	16.5767	37.1054	15.2961	28.9892	11.3618	14.9177	8.67708	12.2111	6.44629	10.4986	12.3485	16.6216	14.4684	19.2919	34.8467	17.9592	15.0915	52.1409	9.78119	26.0195	20.4714	19.2958	2.91852	19.0121	7.34788
ehmt2	8.14984	0.810728	0.958647	0.937587	2.37929	0.708331	0.955129	0.789339	1.32832	1.31539	2.2062	1.95806	5.47038	0.90245	3.0022	2.78217	4.34171	2.88027	2.00724	2.84147	2.42515	1.36745	0.247015	2.67785	4.31231	2.84651	0.19202	0.87922	3.10788	1.73789	3.79353	2.57305	1.27401	0.302395	0.655205	0.544317	0.528378	3.16956	2.20612	0.546281	0.996103	9.16652	1.17385	0.809935	0.792527	1.96614	0	0.684891	1.77831
FPKM of Kdm5b.etc in mouse early embyros
	oocyte_1	oocyte_2	oocyte_3	zygote_1	zygote_2	zygote_3	zygote_4	early2cell_1	early2cell_2	early2cell_3	early2cell_4	early2cell_5	early2cell_6	early2cell_7	early2cell_8	mid2cell_1	mid2cell_2	mid2cell_3	mid2cell_4	mid2cell_5	mid2cell_6	mid2cell_7	mid2cell_8	mid2cell_9	mid2cell_10	late2cell_1	late2cell_2	late2cell_3	late2cell_4	late2cell_5	late2cell_6	late2cell_7	late2cell_8	4cell_1	4cell_2	4cell_3	4cell_4	4cell_5	4cell_6	4cell_7	4cell_8	4cell_9	8cell_1	8cell_2	8cell_3	8cell_4	8cell_5	8cell_6	8cell_7
kdm5b	0.664466	0.561195	0.300461	0.187805	0.309354	0.229535	0.14318	1.68971	0.49858	0.287679	0.0375923	0.136938	0.148155	0.298158	0.505863	36.8574	37.6691	3.68258	4.66522	37.9382	43.9917	50.8048	39.5625	45.4743	31.0359	62.2405	32.9818	35.1437	43.092	32.7006	54.7458	52.4775	57.3314	56.1193	35.6277	49.1121	35.3074	42.6166	43.256	22.7317	22.0596	42.7373	10.2462	15.7078	2.98401	9.68126	12.4001	12.4351	9.33734
dnmt1	63.5668	41.659	125.533	60.7438	66.5167	54.3243	80.1199	35.6483	22.0246	41.9286	41.6643	30.2414	22.3973	24.2829	26.1481	6.43091	9.92918	4.77108	5.11161	12.8021	10.7401	11.6366	12.7159	11.0252	14.3876	20.5257	9.19088	10.0106	5.45655	11.5018	5.66619	12.5075	18.4103	9.79182	10.6982	9.49007	5.53287	9.86835	8.76773	24.8558	6.58221	13.5863	4.94495	4.43051	9.7251	13.5769	8.37457	9.22177	4.58734
dnmt3b	15.6957	15.6891	10.2879	8.83282	9.51895	12.3871	19.248	15.8468	17.5249	7.78317	4.20967	18.2834	7.1981	9.5551	6.2092	5.82784	0.814397	7.12164	6.06413	2.68529	4.17812	8.84062	5.41507	12.7019	4.82116	2.47509	8.84328	3.28707	3.01723	3.94057	7.05615	6.41699	4.49714	2.31527	8.15239	14.8504	4.43453	3.91136	5.75344	18.6393	0.078962	12.0864	23.6759	13.9551	6.00055	31.6528	32.8019	14.7244	20.8704
smarca4	11.6585	8.38519	9.46221	28.8747	16.1087	17.076	8.88789	8.33536	4.51667	14.0461	13.4824	9.56644	10.1797	10.7103	5.3837	5.00263	3.48689	10.145	2.6557	9.78583	9.14751	18.4982	25.0244	14.9191	18.4632	19.6852	17.4215	18.7418	17.5405	15.8888	17.4876	18.7513	21.6985	5.28545	8.27568	18.2058	17.4525	9.93227	21.8232	16.7895	4.26086	26.3518	31.0885	37.6305	32.1857	24.7237	20.2835	29.807	19.0536
hp1 beta	48.9669	48.4474	48.6301	37.2913	40.7335	41.8035	40.1745	50.4853	32.0501	29.6142	27.6235	24.4899	30.049	30.8012	21.7832	11.7551	9.2156	22.1983	19.3646	6.113	10.5558	11.1707	12.9239	11.3284	16.4432	5.3013	5.82324	7.55665	6.78425	5.25177	4.56658	5.7382	7.85253	16.7533	14.2184	6.12834	5.91457	3.58502	13.3412	8.46583	7.14254	9.72321	4.21791	13.6881	9.43051	8.09301	4.1172	11.4767	6.37516
uhrf1	230.851	208.337	226.17	159.363	117.509	168.869	130.743	35.2109	90.8418	60.6155	69.8303	86.4741	106.607	93.0235	49.0455	9.17196	9.89236	5.61295	2.89129	12.5426	3.39042	11.1476	8.25073	16.0818	12.5446	15.2113	6.8538	4.13664	2.09149	3.29035	14.0083	7.89558	6.65473	4.39968	2.6326	4.79858	0	6.85958	8.59735	6.05018	4.6757	0.341952	9.94522	15.1079	2.62304	5.06222	8.3152	19.0758	10.2304
trim28	81.628	91.9493	77.4066	90.3796	45.4662	65.4164	61.0273	10.6823	7.85789	25.198	16.5014	11.4985	14.4839	11.2019	11.5804	115.276	87.3414	4.3107	9.96012	102.2	94.7216	102.083	147.627	92.4497	101.605	155.904	181.677	153.473	155.79	130.012	122.587	165.246	127.132	359.963	191.166	274.218	218.15	162.005	158.292	209.993	201.142	231.367	453.737	390.474	338.724	470.831	335.458	410.366	320.897
Suv39h1	0.312196	0	0.130011	0.507965	0.00194292	0.256743	0	0.222918	0.152395	0.0256293	0.776388	1.86651	0.890183	1.09989	0	12.918	4.4742	14.2481	4.82714	18.167	19.2906	11.6455	26.2952	13.8526	30.5807	8.92847	31.6044	15.0365	35.1533	22.2038	10.8742	21.1462	16.0193	11.7033	5.50962	1.83509	4.88736	0.392106	3.15108	8.16535	24.1021	1.25124	5.0832	6.7367	6.54308	2.6948	4.15347	18.4774	6.98824
Stedb1	27.1693	27.0706	21.0721	37.4942	44.5627	32.0261	43.0913	59.3808	45.7046	61.7881	37.4537	58.9043	55.2133	64.4411	60.5771	27.7917	17.1219	13.5482	12.1643	12.1349	23.8743	21.7261	10.4465	24.0167	21.8772	19.814	18.9888	14.6362	27.3844	14.6931	21.4444	28.5256	17.3747	10.959	14.0746	15.6654	20.305	23.8965	11.1568	14.9998	5.57579	19.8932	21.2508	21.2561	9.17218	4.474	1.87559	3.63195	5.45852
kdm4a	4.82441	2.712	4.38491	8.95099	8.15328	9.19387	5.06603	13.2285	8.8699	5.03557	14.717	3.83881	10.2473	9.03581	11.6361	4.36528	0.08174	3.91046	0.937952	9.2103	3.82185	5.10821	12.88	7.2367	5.31667	6.65692	4.1105	2.45598	3.24893	6.79075	2.93051	6.80409	7.06762	1.87035	0.042068	4.01187	0.922297	0	6.95589	0.37292	1.55798	3.91751	0.77301	0.321959	0	0.554669	0	0.325417	3.38968
ehmt2	0.323406	0.172036	0	0.747387	0.0841842	0.480173	0.897486	0	0	0.345398	0.21993	0.556611	0.719087	0.36185	0	0	0	0	0	0.483425	0	1.01435	0	0	0.58982	3.06683	0.908397	0.0228737	5.41766	0.670605	1.71176	2.4189	0.25175	1.5898	0.538824	9.34794	1.55852	14.4912	11.18	0.926014	4.23827	2.2322	8.27828	26.2688	11.3279	2.84736	5.41885	8.83968	9.22665
FPKM of Kdm5b.etc in goat early embyros	FPKM of Kdm5b.etc in mouse early embyros
	oocyte_1	oocyte_2	oocyte_3	2cell_1	2cell_2	2cell_3	4cell_1	4cell_2	4cell_3	8cell_1	8cell_2	8cell_3	16cell_1	16cell_2	16cell_3	morula_1	morula_2	morula_3
kdm5b	0.306861	0.391695	0.397313	0.631264	0.425381	1.1535	0.605472	0.330697	0.646066	0.829248	0.881022	1.07635	9.77492	16.1222	4.97696	9.35447	3.80863	4.14882
dnmt1	443.742	671.222	391.287	869.156	375.824	953.626	660.176	387.114	397.419	740.352	689.84	371.426	67.3125	111.921	322.547	12.449	9.41393	164.068
hp1 beta	36.982	34.2497	23.9744	33.0292	39.382	39.4091	30.0432	33.4555	33.1434	29.472	36.3785	38.0758	6.94803	11.5603	27.1124	9.95869	3.14149	29.6865
uhrf1	26.6228	35.062	21.091	22.2624	18.0366	29.5785	24.6953	17.9096	20.7715	28.1821	36.8514	20.2692	4.4631	5.76276	14.8989	0.733713	0.748722	9.4579
trim28	4.84172	3.50472	4.53442	4.5969	2.16037	9.74282	5.18377	3.94246	2.187	2.32887	2.10623	1.23805	1.64746	5.31477	1.36571	16.9659	8.7658	8.86549
Stedb1	3.54468	3.92169	1.57368	8.45099	4.92798	9.17631	8.97443	4.97858	7.61278	8.97443	4.97858	7.61278	3.17611	3.08358	4.70703	0.85105	1.18713	4.87406
kdm4a	1.8066	2.3013	0.769862	7.00814	4.37086	5.89717	4.51679	4.09704	4.77958	3.31691	3.90322	2.71373	2.68349	4.55288	3.51642	3.72717	1.59583	5.82596
[truncated: 64 more columns]
