# Supplementary material for: The Novel Role of Zfp296 in Mammalian Embryonic Genome Activation as an H3K9me3 Modulator
Source: Int J Mol Sci. 2023 Jul 12;24(14):11377. doi: 10.3390/ijms241411377 (PMC10379624; doi:10.3390/ijms241411377)
Supplement: Supplementary file 1 [file ijms-24-11377-s001.zip › table S3.xlsx]

## Sheet: Sheet1
FPKM of Trim28,Suv39h1,Setdb1,Kdm4a and Ehmt2 in Zfp296 KO ESCs
	Zfp296__WT1	Zfp296__WT2	Zfp296__KO1	Zfp296__KO2
Trim28	298.89	290.873	233.935	261.712
Suv39h1	2.56964	5.1815	2.38683	3.41159
Setdb1	39.9532	43.0476	33.0018	33.5505
Kdm4a	24.7621	26.7384	29.2983	27.8713
Ehmt2	25.853	24.9297	21.519	20.1472
