# Supplementary material for: The Novel Role of Zfp296 in Mammalian Embryonic Genome Activation as an H3K9me3 Modulator
Source: Int J Mol Sci. 2023 Jul 12;24(14):11377. doi: 10.3390/ijms241411377 (PMC10379624; doi:10.3390/ijms241411377)
Supplement: Supplementary file 1 [file ijms-24-11377-s001.zip › table S4.xlsx]

## Sheet: Sheet1
Explain of the abbreviations
EGA		embryonic genome activation
ZGA		Zygotic genome activation
Zfp296		zinc finger protein 296
pdaj		adjusted p-value
C2H2		Cys2-His2
KDM5B		lysine demethylase 5B
SMARCA4		SWI/SNF related, matrix associated, actin dependent regulator of chromatin, subfamily a, member 4
DNMT1		DNA methyltransferase 1
DNMT3B		DNA methyltransferase 3 beta
HP1β		chromobox 1
UHRF1		ubiquitin like with PHD and ring finger domains 1
H3K9me3		Trimethylation of lysine 9 on histone H3 protein
H3K4me3		Tri-methylation of lysine 4 on histone H3
DUX		Double homeobox
SCNT		Somatic cell nuclear transfer
zf		zinc finger
mESCs		mouse embryonic stem cells
KO		knockout
WT		wild type
e.v		empty vector
GO		gene ontology
NC		Negative control
KRAB		Krüppel-associated box domain
NuRD		The nucleosome-remodeling and deacetylase
